# Supplementary material
Source: PubMed Central journal article supplement (PMC9125447)
Supplement: sj-pdf-1-inc-10.1177_1751143720972630.pdf [file sj-pdf-1-inc-10.1177_1751143720972630.pdf]

## Supplementary File

### APPENDIX A- Questionnaire

|                                                               |                                                                                                             |
|---------------------------------------------------------------|-------------------------------------------------------------------------------------------------------------|
| Profession                                                    | Doctor, nurse, physiotherapist, other                                                                       |
| Current area of practice (speciality)                         | Drop down list to include specialties*                                                                      |
| Current clinical grade                                        | Nurse/physiotherapist – band 1-9<br>Doctor – Foundation trainee, ST1-2, ST3-4, ST5+, consultant, SAS/fellow |
| Prior experience working in ICU/HDU                           | Nil, <6 months, 6 months – 2 years, >2 years                                                                |
| When did you last work in ICU/HDU?                            | <1 year ago, 1- 2 years ago, 3-5 years ago, >5 years ago, never                                             |
| What role are you being asked to undertake this training for? | ICU/HDU in my current hospital<br>ICU/HDU at the Nightingale<br>Other (free text)                           |

### Confidence in practice

For each of the following statement please indicate the relevant score relating to your level of confidence

1=not at all, 2=just a little, 3= somewhat, 4= mostly, 5= totally

| Question                                                                                                                                                    | Circle score |   |   |   |   |
|-------------------------------------------------------------------------------------------------------------------------------------------------------------|--------------|---|---|---|---|
|                                                                                                                                                             | 1            | 2 | 3 | 4 | 5 |
| <b>ICU monitoring and interpretation</b>                                                                                                                    |              |   |   |   |   |
| I am confident that I understand what monitoring critically ill patients need.                                                                              | 1            | 2 | 3 | 4 | 5 |
| I am confident in my ability to interpret and incorporate monitoring into my assessment (SpO <sub>2</sub> , ECG, BP, ABG, capnography, fluid balance, GCS). | 1            | 2 | 3 | 4 | 5 |
| I am confident in identifying the essential parameters to act upon (ABCDE).                                                                                 | 1            | 2 | 3 | 4 | 5 |
| <b>Basics of good ICU care (Doctors and nurses only)</b>                                                                                                    |              |   |   |   |   |
| I am confident in addressing the daily basic care needs of an ICU patient.                                                                                  | 1            | 2 | 3 | 4 | 5 |
| I am confident in knowing what care bundles and tools can be used in ICU.                                                                                   | 1            | 2 | 3 | 4 | 5 |
| I feel confident that I know when to seek specialist support.                                                                                               | 1            | 2 | 3 | 4 | 5 |
| <b>Ventilation (doctors only)</b>                                                                                                                           |              |   |   |   |   |
| I am confident I understand the different modes of ventilation.                                                                                             | 1            | 2 | 3 | 4 | 5 |
| I am confident in my ability to look at a ventilator and change its settings to improve gas exchange.                                                       | 1            | 2 | 3 | 4 | 5 |
| I am confident in my ability to identify common problems with ventilation and troubleshoot appropriately.                                                   | 1            | 2 | 3 | 4 | 5 |
| <b>Mechanical ventilation and non-invasive support (Nurses and physios)</b>                                                                                 |              |   |   |   |   |

|                                                                                                                       |   |   |   |   |   |
|-----------------------------------------------------------------------------------------------------------------------|---|---|---|---|---|
| I am confident I understand the pathophysiology of respiratory failure and indication for mechanical ventilation.     | 1 | 2 | 3 | 4 | 5 |
| I am confident I understand the principles of mechanical ventilation.                                                 | 1 | 2 | 3 | 4 | 5 |
| I am confident I understand the common types and modes of ventilation.                                                | 1 | 2 | 3 | 4 | 5 |
| <b>ARDS Management</b>                                                                                                |   |   |   |   |   |
| I am confident in my knowledge of the pathophysiology and clinical presentation of ARDS.                              | 1 | 2 | 3 | 4 | 5 |
| I am confident in my ability to manage a mechanically ventilated ARDS patient.                                        | 1 | 2 | 3 | 4 | 5 |
| I am confident in my ability to optimise the management of a COVID patient with ARDS.                                 | 1 | 2 | 3 | 4 | 5 |
| <b>Vasoactive and sedative drugs (Nurses and doctors)</b>                                                             |   |   |   |   |   |
| I am confident in my ability to assess the haemodynamic status of a critically ill patient.                           | 1 | 2 | 3 | 4 | 5 |
| I am confident in my ability to use common vasoactive drugs to optimise perfusion.                                    | 1 | 2 | 3 | 4 | 5 |
| I am confident in my ability to assess the need for sedation and analgesia in the critically ill.                     | 1 | 2 | 3 | 4 | 5 |
| I am confident in my ability to use common sedatives and analgesics in the critically ill.                            | 1 | 2 | 3 | 4 | 5 |
| <b>Assessment of the critically ill patient (Physio)</b>                                                              |   |   |   |   |   |
| I am confident in my ability to complete an ABCDE assessment in the critically ill patient.                           | 1 | 2 | 3 | 4 | 5 |
| I am confident in my ability to initiate basic intervention based on my ABCDE assessment.                             | 1 | 2 | 3 | 4 | 5 |
| <b>Physiotherapy management (physio)</b>                                                                              |   |   |   |   |   |
| I am confident in my knowledge of the clinical practice guidelines for physiotherapy management of the COVID patient. | 1 | 2 | 3 | 4 | 5 |
| I am confident in my understanding of the physiological principles of recommended interventions for COVID patients.   | 1 | 2 | 3 | 4 | 5 |
| I am confident in my ability to carry out practical techniques for recommended interventions for COVID patients.      | 1 | 2 | 3 | 4 | 5 |

### Free text comments for each lecture/tutorial

|                                                                                          |  |
|------------------------------------------------------------------------------------------|--|
| Please comment on the lecture " <i>Introduction of COVID 19 in critical care</i> ".      |  |
| Please comment on the lecture and tutorial on <i>ICU monitoring and interpretation</i> . |  |
| Please comment on the lecture and tutorial on <i>basics of good ICU care</i> .           |  |
| Please comment on the lecture and tutorial on <i>ventilation</i> .                       |  |
| Please comment on the lecture and tutorial on <i>ARDS management</i> .                   |  |
| Please comment on the lecture and tutorial on <i>vasoactive drugs and sedation</i> .     |  |

|                                                                                                      |  |
|------------------------------------------------------------------------------------------------------|--|
| Please comment on the lecture and tutorial on <i>physiotherapy assessment of the ICU patient</i> .   |  |
| Please comment on the lecture and tutorial on <i>physiotherapy management of the COVID patient</i> . |  |
| Please comment on the <i>open discussion and course summary</i> .                                    |  |

**Overall**

How likely are you to recommend this course to your colleagues?

**Course booking and instruction, organisation and IT support (1=poor, 2=satisfactory, 3=excellent)**

|                                                                                                                                    |   |   |   |
|------------------------------------------------------------------------------------------------------------------------------------|---|---|---|
| Please rate the ease of use of the booking system.                                                                                 | 1 | 2 | 3 |
| Please rate the quality of the instructions for the course setup.                                                                  | 1 | 2 | 3 |
| Please rate the utility of the online platform for both lectures and tutorials                                                     | 1 | 2 | 3 |
| Please rate the organisation on the day.                                                                                           | 1 | 2 | 3 |
| Please let us know any specific issues on the course instruction, set up, online platform and organisation of the day. (free text) |   |   |   |
